# Supplementary material for: Altered sulfation status of FAM20C-dependent chondroitin sulfate is associated with osteosclerotic bone dysplasia
Source: PubMed Central journal article supplement (PMC9792594; doi:10.1038/s41467-022-35687-3), 2022-12-26
Supplement: 41467_2022_35687_MOESM1_ESM.pdf [file 41467_2022_35687_MOESM1_ESM.pdf]

## **Supplementary Information**

**Altered sulfation status of FAM20C-dependent chondroitin sulfate is associated with osteosclerotic bone dysplasia.**

**Toshiyasu Koike<sup>1</sup>, Tadahisa Mikami<sup>1</sup>, Jun-ichi Tamura<sup>2</sup> & Hiroshi Kitagawa<sup>1</sup>**

<sup>1</sup>Laboratory of Biochemistry, Kobe Pharmaceutical University, Higashinada-ku, Kobe 658-8558, Japan. <sup>2</sup>Department of Agricultural, Life and Environmental Sciences, Faculty of Agriculture, Tottori University, Tottori 680-8551, Japan.

Correspondence to: Hiroshi Kitagawa (kitagawa@kobepharma-u.ac.jp)

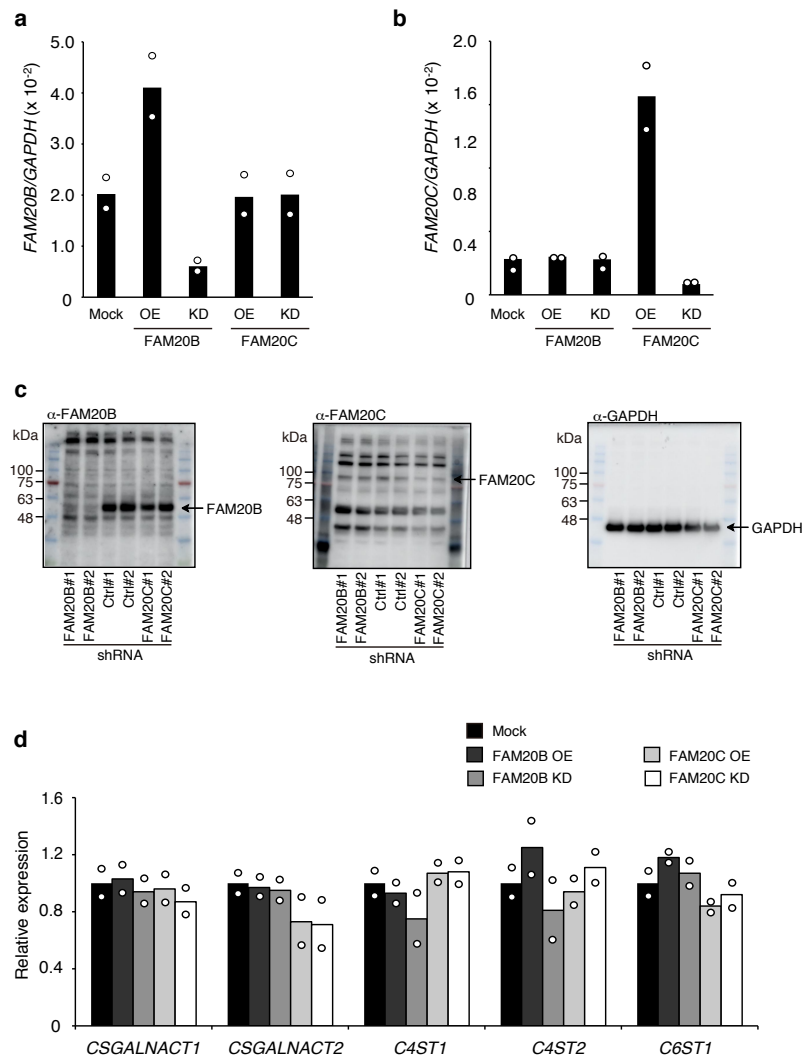

**Supplementary Figure 1** Establishment of FAM20B-related or FAM20C-related stable HeLa cell lines. **(a,b)** Relative expression level of the transcripts for FAM20B **(a)** or FAM20C **(b)** (normalized to that of *GAPDH*) in mock-transfected (Mock), FAM20B overexpressing (OE), FAM20B knockdown (KD), FAM20C OE, and FAM20C KD HeLa cell lines (n = 2 independent experiments). **(c)** Cell lysates from FAM20B KD (FAM20B#1 and #2), non-targeting control (Ctrl#1 and #2), and FAM20C KD (FAM20C#1 and #2) HeLa cell lines were analyzed by immunoblotting to evaluate knockdown efficiency for FAM20B and FAM20C. GAPDH was used as a loading control. Data are obtained from three independent experiments and representative images are shown. **(d)** Expression profiles of genes involved in CS biosynthesis in stable HeLa cell lines. The expression level of the respective transcripts was normalized to that of *GAPDH* (n = 2 independent experiments). Source data are provided as a Source Data file.

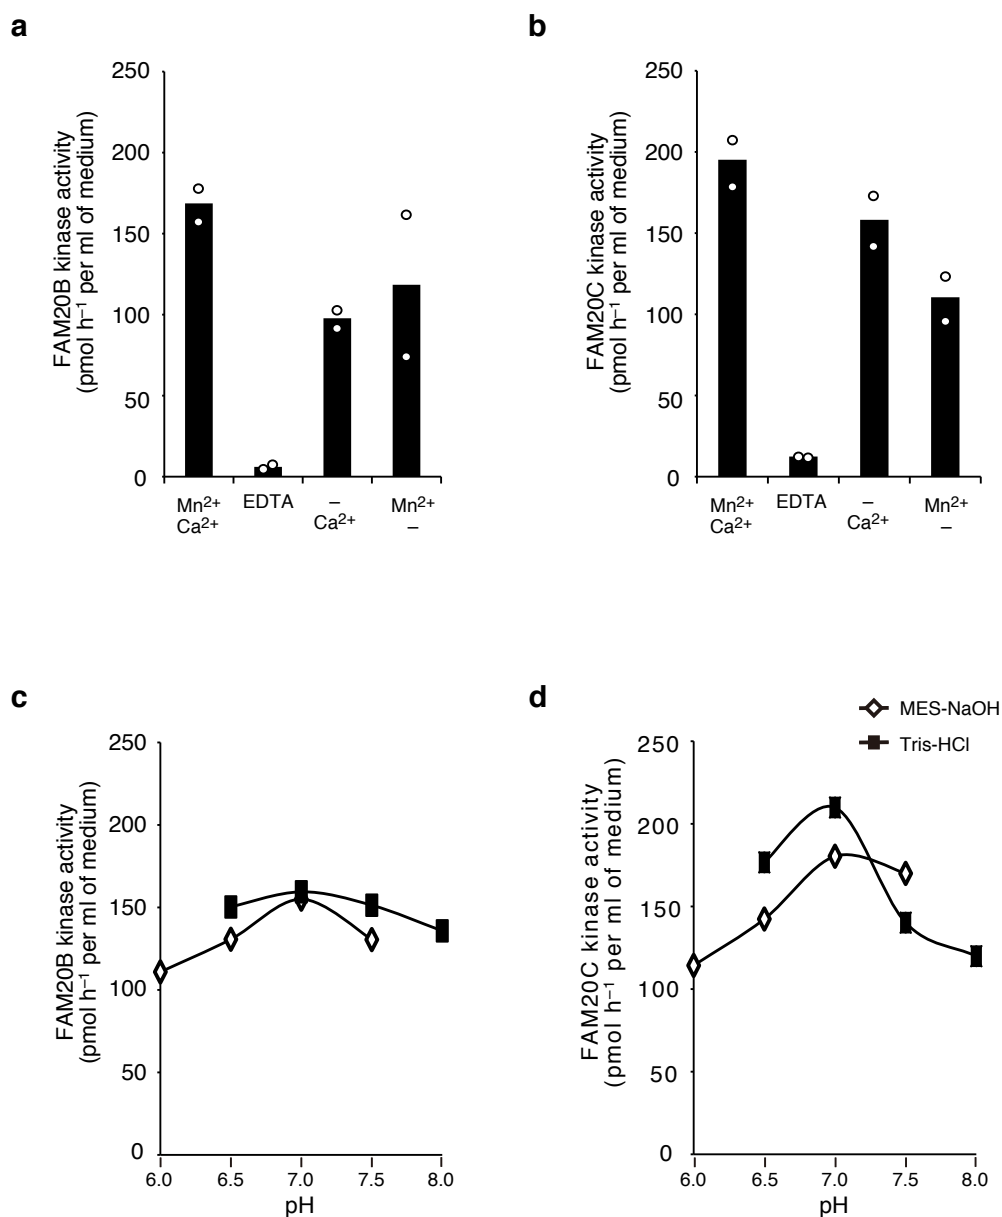

**Supplementary Figure 2** Enzymatic characteristics of soluble forms of FAM20B and FAM20C. The metal ion dependence (**a,b**) and the pH dependence (**c,d**) for Xyl kinase activities of FAM20B (**a,c**) and FAM20C (**b,d**) toward GlcA $\beta$ 1-3Gal $\beta$ 1-3Gal $\beta$ 1-4Xyl $\beta$ 1-*O*-SerGlyTrpProAspGly were determined under standard assay conditions in the presence of divalent cations or EDTA in different buffers. Data in **a** and **b** are the mean values from two independent experiments. Data in **c** and **d** correspond to raw data from single experiment. Source data are provided as a Source Data file.

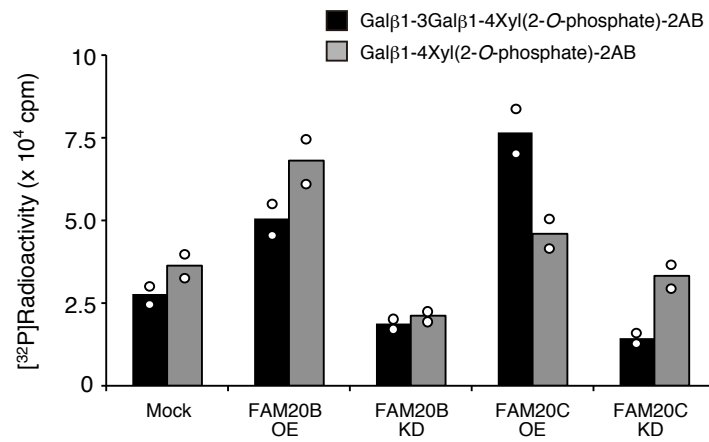

**Supplementary Figure 3** Detection of the GAG linkage saccharide intermediates from FAM20B-related or FAM20C-related stable HeLa cell lines. Data are the mean values from two independent experiments. Source data are provided as a Source Data file.

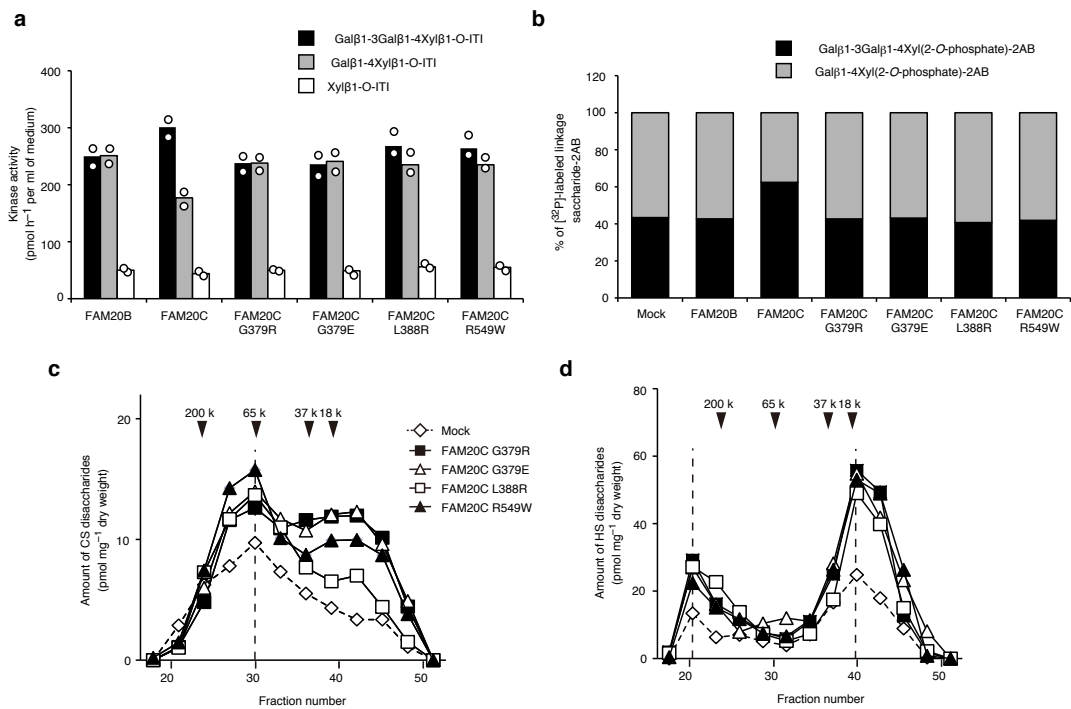

**Supplementary Figure 4** XYLK activity-dependent GAG biosynthesis is not affected by Raine syndrome mutations in FAM20C. **(a)** Kinase activities of soluble forms of FAM20 proteins toward ITI preparations. Data are the mean values from two independent experiments. **(b)** The relative proportions of the linkage saccharide intermediates from stable HeLa cell lines overexpressing wild-type FAM20B, wild-type FAM20C or mutant FAM20C proteins. Data are the mean values from two independent experiments. **(c, d)** Gel filtration elution profiles of **(c)** CS and **(d)** HS chains from stable HeLa cell lines overexpressing each of the mutant FAM20C proteins. Numbered arrowheads (200 k, 65 k, 37 k, and 18 k) indicate the elution position of 200-, 65-, 37-, and 18-kDa saccharides derived from size-defined commercial dextran, respectively. The profile data for mock cells in **c** and **d** are identical to those in Figs. 1**d** and **e**, respectively. Results represent the average of two series of independent experiments. Source data are provided as a Source Data file.

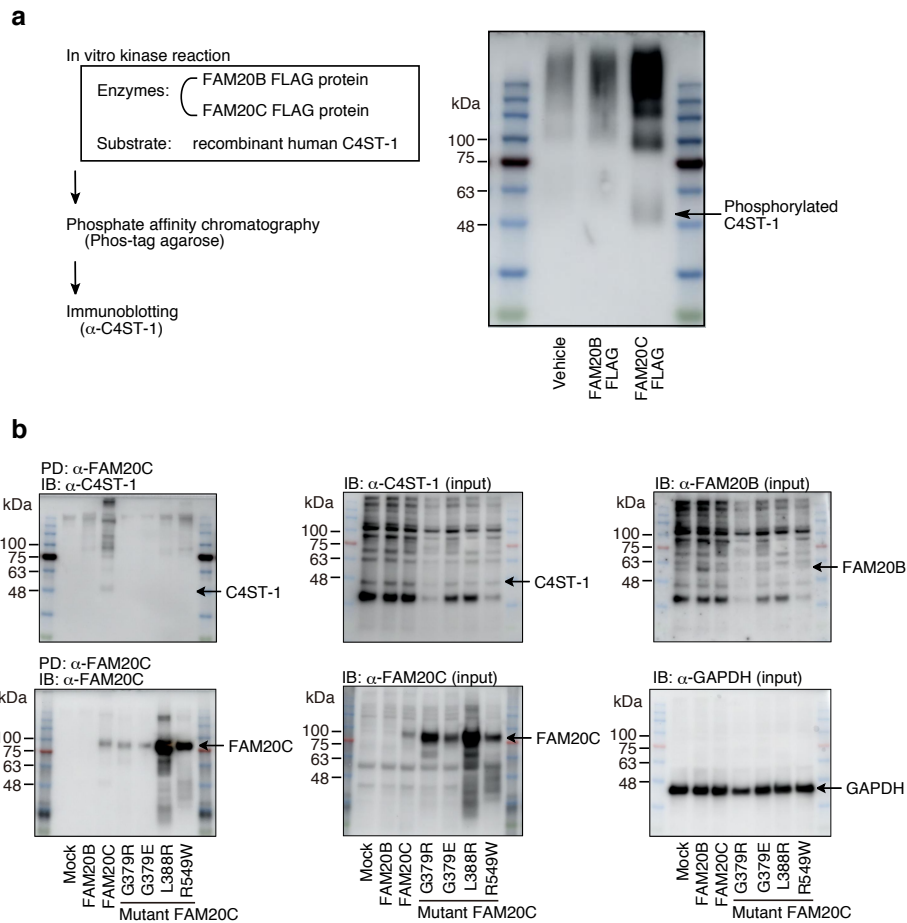

**Supplementary Figure 5** FAM20C interacts with C4ST-1. **(a)** Recombinant C4ST-1 can be phosphorylated by a soluble form of FLAG-tagged FAM20C, but not that of FAM20B, *in vitro*. An *in vitro* kinase assay was performed by incubating recombinant C4ST-1 and the purified FLAG-tagged FAM20 proteins. The phosphorylated proteins in the reaction mixtures were isolated by phosphate affinity chromatography using phos-tag agarose. The resultant samples were analyzed by immunoblotting using an anti-C4ST-1 antibody (L18). Data are obtained from three independent experiments and a representative image is shown. **(b)** Wild-type FAM20C, but not its Raine syndrome mutants, can physically interact with endogenous C4ST-1 in Saos-2 cells. The anti-FAM20C immunoprecipitates from formaldehyde-treated cell lysates of stable Saos cell lines overexpressing FAM20 proteins were analyzed by immunoblotting using anti-C4ST-1 antibody (L18) and anti-FAM20C antibody. Data are obtained from three independent experiments and representative images are shown. Source data are provided as a Source Data file.

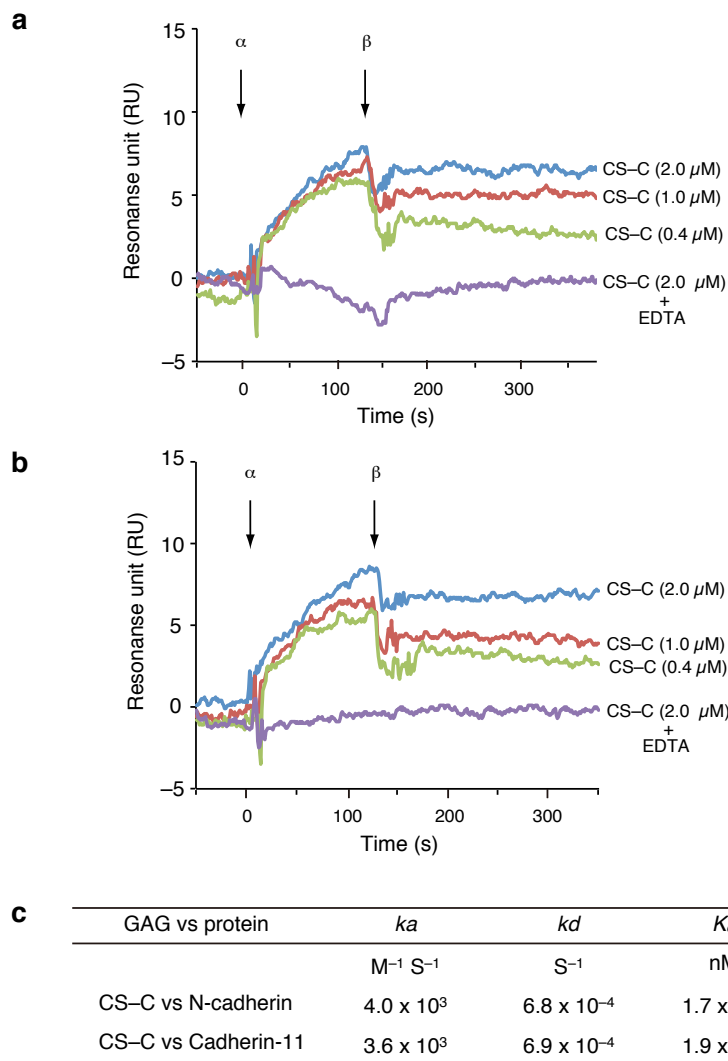

**Supplementary Figure 6** CS-C binds to N-cadherin and cadherin-11. **(a,b)** Overlaid sensorgrams for the binding of CS-C to immobilized N-cadherin **(a)** or cadherin-11 **(b)** in a BIAcore system. Various concentrations of CS-C were individually injected over the N-cadherin- or cadherin-11-immobilized sensor chip in the presence of 3 mM  $CaCl_2$  or 3 mM EDTA. The beginning of the association and dissociation phases is marked by arrows labeled  $\alpha$  and  $\beta$ , respectively. RU, resonance units. **(c)** Kinetic parameters for the interaction of CS-C with immobilized N-cadherin or cadherin-11. Values of the apparent association ( $k_a$ ) and dissociation ( $k_d$ ) rate constants, and equilibrium dissociation constants ( $K_d$ ), are expressed as mean  $\pm$  s.d. Source data are provided as a Source Data file.

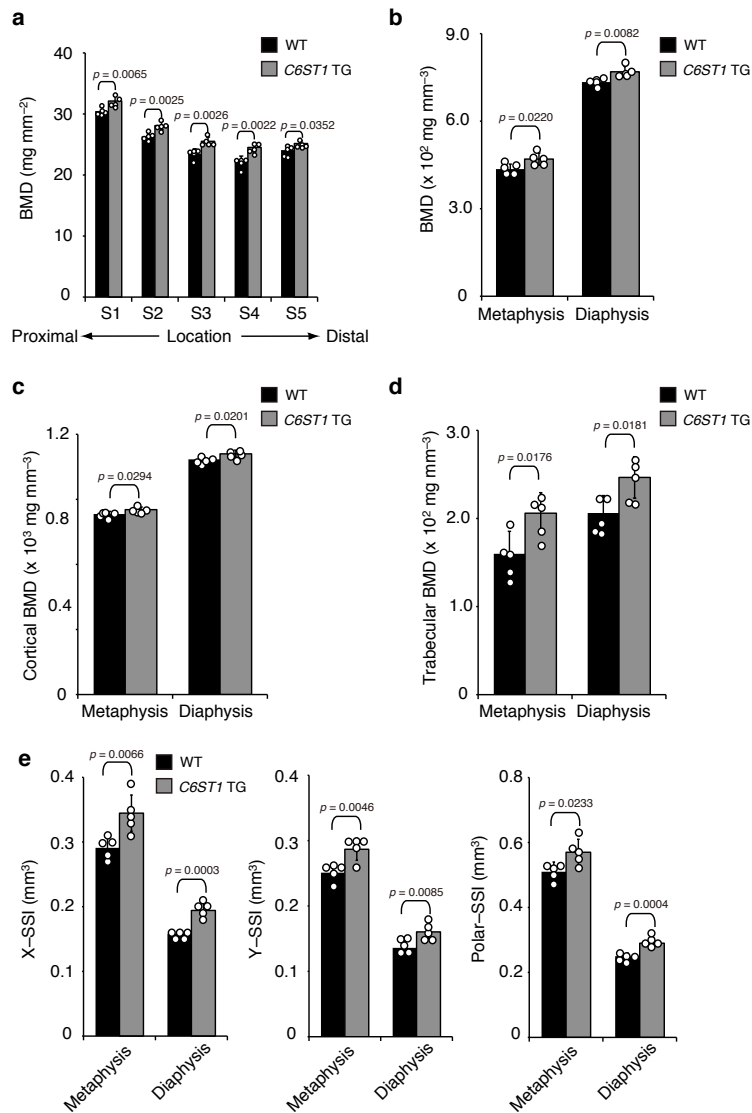

**Supplementary Figure 7** Assessment of the BMD of tibias from 16-week-old wild-type (WT) or *C6ST1* transgenic (TG) male mice. **(a)** BMD of each of 5 equal longitudinal divisions of the tibias were determined by peripheral quantitative computed tomography, pQCT (n = 5 bones from total, each from different litters, unpaired Student's *t* test, two-sided). **(b-d)** Dual energy X-ray absorptiometry (DXA)-derived measurements of BMD at the tibial metaphysis and diaphysis (n = 5 bones from total, each from different litters, unpaired Student's *t* test, two-sided). **(e)** X-axis, Y-axis, and polar stress-strain indexes (SSIs) of tibias from 16-week-old WT or *C6ST1* TG male mice were calculated as surrogate measurements of bone mechanical strength (n = 5 bones from total, each from different litters, unpaired Student's *t* test, two-sided). Data in **a-e** are represented as mean  $\pm$  s.d. Source data are provided as a Source Data file.



**Supplementary Table 1** Disaccharide composition of GAG chains from stable clones of HeLa cells.

| CS disaccharides                 | pmol mg <sup>-1</sup> (mol%) <sup>a</sup> |                    |                    |                    |                    |                   |                    |
|----------------------------------|-------------------------------------------|--------------------|--------------------|--------------------|--------------------|-------------------|--------------------|
|                                  | FAM20C KD                                 | Mock               | FAM20C OE          | FAM20C G379R       | FAM20C G379E       | FAM20C L388R      | FAM20C R549W       |
| ΔHexA <sup>b</sup> -GalNAc       | 1.1 ± 1.0 (3)                             | 1.7 ± 0.3 (3)      | 1.7 ± 0.5 (2)      | 2.1 ± 0.6 (3)      | 3.5 ± 0.4 (4)      | 1.1 ± 0.1 (2)     | 3.1 ± 2.4 (3)      |
| ΔHexA-GalNAc(6S)                 | 7.0 ± 0.8 (20)                            | 8.7 ± 1.5 (17)     | 9.5 ± 1.1 (10)     | 15.3 ± 1.0 (18)    | 16.6 ± 0.8 (18)    | 14.3 ± 1.2 (20)   | 17.8 ± 1.7 (20)    |
| ΔHexA-GalNAc(4S)                 | 24.9 ± 0.6 (71)                           | 37.9 ± 4.0 (74)    | 73.0 ± 11.0 (79)   | 61.1 ± 4.0 (73)    | 66.2 ± 3.7 (72)    | 52.4 ± 2.3 (73)   | 65.2 ± 5.7 (72)    |
| ΔHexA(2S)-GalNAc(6S)             | 0.7 ± 0.3 (2)                             | 1.2 ± 0.3 (2)      | 0.7 ± 0.6 (1)      | 1.8 ± 0.2 (2)      | 2.0 ± 0.2 (2)      | 1.5 ± 0.5 (2)     | 1.6 ± 0.3 (2)      |
| ΔHexA-GalNAc(4S,6S)              | 1.1 ± 0.4 (3)                             | 1.9 ± 0.7 (4)      | 7.5 ± 1.6 (8)      | 3.5 ± 0.4 (4)      | 3.6 ± 0.4 (4)      | 2.6 ± 0.5 (4)     | 3.1 ± 0.3 (3)      |
| Total CS disaccharides           | 34.9 ± 1.8 (100)                          | 51.4 ± 3.7 (100)   | 92.4 ± 9.7 (100)   | 83.7 ± 3.7 (100)   | 91.9 ± 2.3 (100)   | 71.8 ± 4.2 (100)  | 91.0 ± 5.4 (100)   |
| HS disaccharides                 | FAM20C KD                                 | Mock               | FAM20C OE          | FAM20C G379R       | FAM20C G379E       | FAM20C L388R      | FAM20C R549W       |
| ΔHexA-GlcNAc                     | 33.6 ± 2.2 (48)                           | 49.4 ± 5.7 (44)    | 101.1 ± 2.9 (50)   | 111.3 ± 4.1 (49)   | 116.6 ± 9.0 (48)   | 92.6 ± 2.2 (47)   | 112.1 ± 5.0 (52)   |
| ΔHexA-GlcNAc(6S)                 | 0.7 ± 0.4 (1)                             | 1.8 ± 0.5 (2)      | 2.3 ± 0.7 (1)      | 2.3 ± 0.7 (1)      | 2.4 ± 0.4 (1)      | 2.0 ± 0.2 (1)     | 2.3 ± 0.6 (1)      |
| ΔHexA-GlcN(NS)                   | 20.3 ± 6.1 (29)                           | 36.2 ± 6.0 (32)    | 72.2 ± 1.7 (36)    | 79.5 ± 12.1 (35)   | 87.5 ± 9.4 (36)    | 69.0 ± 2.8 (35)   | 81.8 ± 4.6 (38)    |
| ΔHexA-GlcN(NS,6S)                | 0.8 ± 0.4 (1)                             | 2.5 ± 0.8 (2)      | 4.5 ± 0.9 (2)      | 4.5 ± 1.2 (2)      | 4.9 ± 0.3 (2)      | 3.9 ± 0.2 (2)     | 4.7 ± 1.1 (2)      |
| ΔHexA(2S)-GlcN(NS)               | 7.7 ± 3.6 (11)                            | 10.9 ± 1.3 (10)    | 13.8 ± 7.7 (7)     | 18.2 ± 1.8 (8)     | 19.4 ± 2.3 (8)     | 15.8 ± 0.2 (8)    | 18.7 ± 1.5 (8)     |
| ΔHexA(2S)-GlcN(6S,NS)            | 6.9 ± 3.7 (10)                            | 12.2 ± 1.8 (11)    | 9.7 ± 1.1 (5)      | 11.4 ± 2.3 (5)     | 12.2 ± 0.7 (5)     | 13.8 ± 1.9 (7)    | 14.0 ± 1.7 (6)     |
| Total HS disaccharides           | 69.9 ± 9.9 (100)                          | 113.0 ± 13.3 (100) | 203.6 ± 13.2 (100) | 227.2 ± 18.3 (100) | 243.0 ± 19.8 (100) | 197.0 ± 5.3 (100) | 233.6 ± 14.1 (100) |
| Relative expression <sup>c</sup> | 0.3                                       | 1.0                | 5.4                | 9.4                | 10.9               | 4.5               | 9.5                |

<sup>a</sup>The values are expressed as pmol of disaccharide per mg of dried homogenate and represent the mean ± s.d. (n = 3).

<sup>b</sup>ΔHexA, GalNAc, GlcNAc, and GlcN represent unsaturated hexuronic acid, *N*-acetylgalactosamine, *N*-acetylglucosamine, and glucosamine, respectively; 6S, 4S, 2S, and NS represent 6-*O*-sulfate, 4-*O*-sulfate, 2-*O*-sulfate, and 2-*N*-sulfate, respectively.

<sup>c</sup>Quantitative real-time RT-PCR was used to measure relative amounts of the *FAM20C* transcript. *FAM20C* mRNA levels were normalized to that of *GAPDH* (glyceraldehyde-3-phosphate dehydrogenase).

Source data are provided as a Source Data file.

**Supplementary Table 2** Comparison of kinase activities of fusion proteins secreted into the culture medium by the transfected COS-1 cells.

| Acceptor substrate                                                                            | FAM20B                                                               | FAM20C       | FAM20B(D309G)   | FAM20B(D478G) |
|-----------------------------------------------------------------------------------------------|----------------------------------------------------------------------|--------------|-----------------|---------------|
|                                                                                               | Kinase activity (pmol h <sup>-1</sup> per ml of medium) <sup>a</sup> |              |                 |               |
| $\alpha$ -TM <sup>b</sup>                                                                     | 171.2 ± 17.6                                                         | 188.6 ± 18.1 | – <sup>c</sup>  | –             |
| GlcA $\beta$ 1-3Gal $\beta$ 1-3Gal $\beta$ 1-4Xyl $\beta$ 1- <i>O</i> -<br>SerGlyTrpProAspGly | 155.6 ± 2.9                                                          | 178.2 ± 46.1 | ND <sup>d</sup> | ND            |
| Gal $\beta$ 1-3Gal $\beta$ 1-4Xyl $\beta$ 1- <i>O</i> -Ser                                    | 50.2 ± 3.5                                                           | 57.7 ± 14.0  | –               | –             |
| Gal $\beta$ 1-3Gal $\beta$ 1-4Xyl(2- <i>O</i> -phosphate) $\beta$ 1- <i>O</i> -Ser            | ND                                                                   | ND           | –               | –             |

<sup>a</sup>The values are the mean ± s.d. For FAM20B and FAM20C, n = 3; For FAM20B(D309G) and FAM20C(D478G), n = 2.

<sup>b</sup> $\alpha$ -TM contains a tetrasaccharide linkage, GlcA $\beta$ 1-3Gal $\beta$ 1-3Gal $\beta$ 1-4Xyl<sup>58</sup>.

<sup>c</sup>–, not tested.

<sup>d</sup>ND, not detected (< 0.1 pmol h<sup>-1</sup> per ml of medium).

Source data are provided as a Source Data file.

**Supplementary Table 3** Comparison of kinase activities of FAM20B and FAM20C toward ITI preparations.

| Acceptor substrate                 | FAM20B                                                               | FAM20C       |
|------------------------------------|----------------------------------------------------------------------|--------------|
|                                    | Kinase activity (pmol h <sup>-1</sup> per ml of medium) <sup>a</sup> |              |
| Galβ1-3Galβ1-4Xylβ1- <i>O</i> -ITI | 249.8 ± 33.0                                                         | 298.6 ± 18.3 |
| Galβ1-4Xylβ1- <i>O</i> -ITI        | 251.2 ± 32.4                                                         | 176.7 ± 21.4 |
| Xylβ1- <i>O</i> -ITI               | 49.9 ± 11.6                                                          | 44.1 ± 8.9   |

<sup>a</sup>The values are the mean ± s.d. (n = 3).

Source data are provided as a Source Data file.

**Supplementary Table 4** Disaccharide composition of CS chains from stable clones of murine fibroblastic L and its mutant cell line, sog9 cells.

| CS disaccharides                                  | pmol mg <sup>-1</sup> (mol%) <sup>a</sup> |                    |                    |                    |                    |
|---------------------------------------------------|-------------------------------------------|--------------------|--------------------|--------------------|--------------------|
|                                                   | L-mock                                    | L-FAM20B-1         | L-FAM20B-2         | L-FAM20C-1         | L-FAM20B-2         |
| ΔHexA-GalNAc                                      | 36.9 ± 0.7 (10)                           | 45.2 ± 2.8 (9)     | 48.6 ± 6.7 (10)    | 35.0 ± 2.8 (8)     | 33.5 ± 0.7 (6)     |
| ΔHexA-GalNAc(6S)                                  | 11.2 ± 0.2 (3)                            | 18.1 ± 1.3 (4)     | 22.8 ± 3.7 (5)     | 10.9 ± 2.7 (2)     | 11.9 ± 2.7 (2)     |
| ΔHexA-GalNAc(4S)                                  | 275.5 ± 1.7 (76)                          | 365.3 ± 13.4 (76)  | 374.3 ± 46.7 (74)  | 348.8 ± 16.8 (78)  | 442.5 ± 14.5 (80)  |
| ΔHexA(2S)-GalNAc(6S)                              | ND <sup>b</sup>                           | ND                 | ND                 | ND                 | ND                 |
| ΔHexA-GalNAc(4S,6S)                               | 41.1 ± 1.0 (11)                           | 54.9 ± 4.1 (11)    | 57.6 ± 7.9 (11)    | 51.1 ± 3.0 (11)    | 65.2 ± 1.3 (12)    |
| Total CS disaccharides                            | 364.8 ± 1.1 (100)                         | 483.5 ± 21.4 (100) | 503.3 ± 64.9 (100) | 445.7 ± 19.0 (100) | 553.1 ± 14.7 (100) |
| Relative expression of <i>FAM20B</i> <sup>c</sup> | 1.0                                       | 2.0                | 3.5                | 1.0                | 1.1                |
| Relative expression of <i>FAM20C</i> <sup>c</sup> | 1.0                                       | 1.2                | 1.0                | 2.1                | 3.6                |
| CS disaccharides                                  | sog9-mock                                 | sog9-FAM20B-1      | sog9-FAM20B-2      | sog9-FAM20C-1      | sog9-FAM20B-2      |
| ΔHexA-GalNAc                                      | 44.2 ± 2.0 (50)                           | 67.4 ± 2.7 (60)    | 73.8 ± 7.1 (60)    | 76.3 ± 2.5 (62)    | 81.4 ± 7.1 (63)    |
| ΔHexA-GalNAc(6S)                                  | 15.2 ± 0.3 (17)                           | 21.0 ± 1.7 (19)    | 23.9 ± 1.4 (19)    | 22.2 ± 1.9 (18)    | 24.1 ± 0.6 (19)    |
| ΔHexA-GalNAc(4S)                                  | 27.9 ± 1.0 (32)                           | 23.9 ± 0.4 (21)    | 24.4 ± 2.8 (20)    | 23.2 ± 1.0 (19)    | 23.0 ± 2.9 (18)    |
| ΔHexA(2S)-GalNAc(6S)                              | ND                                        | ND                 | ND                 | ND                 | ND                 |
| ΔHexA-GalNAc(4S,6S)                               | 1.0 ± 0.2 (1)                             | 0.6 ± 0.2 (1)      | 1.0 ± 0.3 (1)      | 1.1 ± 0.1 (1)      | 0.9 ± 0.4 (1)      |
| Total CS disaccharides                            | 88.2 ± 3.5 (100)                          | 113.0 ± 3.3 (100)  | 123.1 ± 11.5 (100) | 122.9 ± 1.6 (100)  | 129.5 ± 6.9 (100)  |
| Relative expression of <i>FAM20B</i>              | 1.0                                       | 2.3                | 3.1                | 1.2                | 1.1                |
| Relative expression of <i>FAM20C</i>              | 1.0                                       | 1.0                | 1.1                | 2.6                | 3.6                |

<sup>a</sup>The values are expressed as pmol of disaccharide per mg of dried homogenate and represent the mean ± s.d. (n = 3).

<sup>b</sup>ND, not detected.

<sup>c</sup>Quantitative real-time RT-PCR was used to measure relative amounts of the *FAM20B/Fam20b* or *FAM20C/Fam20c* transcripts. The respective mRNA levels were normalized to that of *Gapdh*.

Source data are provided as a Source Data file.

**Supplementary Table 5** Disaccharide composition of CS chains from stable clones of MC3T3-E1 cells.

| CS disaccharides                 | pmol mg <sup>-1</sup> (mol%) <sup>a</sup> |                    |                   |                    |
|----------------------------------|-------------------------------------------|--------------------|-------------------|--------------------|
|                                  | Parental                                  | Mock               | C6ST-1 OE #1      | C6ST-1 OE #2       |
| ΔHexA-GalNAc                     | 22.0 ± 3.0 (5)                            | 24.4 ± 1.4 (6)     | 22.8 ± 1.0 (5)    | 20.3 ± 2.2 (5)     |
| ΔHexA-GalNAc(6S)                 | 7.3 ± 0.6 (2)                             | 7.2 ± 0.6 (2)      | 11.0 ± 0.9 (3)    | 16.4 ± 3.8 (4)     |
| ΔHexA-GalNAc(4S)                 | 366.4 ± 24.0 (90)                         | 377.1 ± 22.5 (90)  | 376.3 ± 2.8 (89)  | 383.1 ± 18.8 (89)  |
| ΔHexA(2S)-GalNAc(6S)             | ND <sup>b</sup>                           | ND                 | ND                | ND                 |
| ΔHexA-GalNAc(4S,6S)              | 11.8 ± 1.2 (3)                            | 12.6 ± 1.3 (3)     | 12.2 ± 1.4 (3)    | 12.1 ± 1.2 (3)     |
| Total CS disaccharides           | 407.6 ± 28.6 (100)                        | 421.3 ± 24.5 (100) | 422.4 ± 2.9 (100) | 431.9 ± 20.4 (100) |
| Relative expression <sup>c</sup> | 1.0                                       | 1.0                | 1.8               | 2.7                |

<sup>a</sup>The values are expressed as pmol of disaccharide per mg of dried homogenate and represent the mean ± s.d. (n = 3).

<sup>b</sup>ND, not detected.

<sup>c</sup>Quantitative real-time RT-PCR was used to measure relative amounts of the *C6st1* transcript. *C6st1* mRNA levels were normalized to that of *Gapdh*.

Source data are provided as a Source Data file.

**Supplementary Table 6** Disaccharide composition of CS chains from BMSCs derived from wild-type or *C6ST1* transgenic mice.

| CS disaccharides       | pmol mg <sup>-1</sup> (mol%) <sup>a</sup> |                         |
|------------------------|-------------------------------------------|-------------------------|
|                        | Wild-type                                 | <i>C6ST1</i> transgenic |
| ΔHexA-GalNAc           | 7.3 ± 2.0 (1)                             | 6.3 ± 2.7 (1)           |
| ΔHexA-GalNAc(6S)       | 14.3 ± 3.2 (2)                            | 49.5 ± 5.7 (6)          |
| ΔHexA-GalNAc(4S)       | 783.6 ± 31.9 (94)                         | 716.4 ± 58.3 (89)       |
| ΔHexA(2S)-GalNAc(6S)   | 2.5 ± 0.8 (0)                             | 8.0 ± 2.3 (1)           |
| ΔHexA-GalNAc(4S,6S)    | 29.5 ± 1.4 (4)                            | 22.2 ± 4.8 (3)          |
| Total CS disaccharides | 837.2 ± 38.8 (100)                        | 802.4 ± 73.3 (100)      |

<sup>a</sup>The values are expressed as pmol of disaccharide per mg of dried homogenate and represent the mean ± s.d. (n = 3).

Source data are provided as a Source Data file.

**Supplementary Table 7** Antibodies used in this study

| Antibody (clone)           | Source of species | Cat. No.    | Dilution etc.         | Applications        | Suppliers     |
|----------------------------|-------------------|-------------|-----------------------|---------------------|---------------|
| Anti-FLAG (M2)             | mouse             | #F1804      | 1:1,000               | Western blotting    | Sigma-Aldrich |
| Anti-His-tag               | rabbit            | #2365       | 1:1,000               | Western blotting    | CST           |
| Anti-FAM20C                | rabbit            | #25395-1-AP | 1:1,000               | Western blotting    | Proteintech   |
|                            |                   |             | 1 µg/sample           | Immunoprecipitation |               |
| Anti-FAM20B (1018512)      | mouse             | #MAB8427    | 1:250                 | Western blotting    | R&D systems   |
| Anti-C4ST-1 (L18)          | mouse             | #sc-100868  | 1:200                 | Western blotting    | Santa Cruz    |
| Anti-GAPDH (5A12)          | mouse             | #014-25524  | 1:1,000               | Western blotting    | Fujifilm Wako |
| Anti-N-cadherin (GC4)      | mouse             | #C3865      | 5 ng ml <sup>-1</sup> | Neutralization      | Sigma-Aldrich |
| Anti-cadherin-11 (16G5)    | mouse             | #ab151446   | 5 ng ml <sup>-1</sup> | Neutralization      | Abcam         |
| Anti-ERK1/2                | rabbit            | #9102       | 1:1,000               | Western blotting    | CST           |
| Anti-phospho-ERK1/2        | rabbit            | #9101       | 1:1,000               | Western blotting    | CST           |
| Anti-Smad1                 | rabbit            | #9743       | 1:1,000               | Western blotting    | CST           |
| Anti-phospho-Smad1/5/8     | rabbit            | #9511       | 1:1,000               | Western blotting    | CST           |
| Anti-Smad3                 | rabbit            | #9523       | 1:1,000               | Western blotting    | CST           |
| Anti-phospho-Smad3         | rabbit            | #9520       | 1:1,000               | Western blotting    | CST           |
| Anti-mouse IgG HRP-linked  | sheep             | #NA931      | 1:5,000               | Western blotting    | Cytiva        |
| Anti-rabbit IgG HRP-linked | donkey            | #NA934      | 1:10,000              | Western blotting    | Cytiva        |
| Anti-goat IgG HRP-linked   | mouse             | #sc-2354    | 1:5,000               | Western blotting    | Santa Cruz    |

**Supplementary Table 8** Primers used for construction of expression plasmids

| Construct                    |                 | Forward/sense (5'–3')                             | Reverse/antisense (5'–3')                |
|------------------------------|-----------------|---------------------------------------------------|------------------------------------------|
| pCMV-FAM20Cs                 |                 | CA <u>AAGATCT</u> <sup>a</sup> GGCAGAACGCGCTCCAGG | CA <u>AAGATCT</u> CCCCTCTGTCTCTGTCCC     |
| pCMV-FAM20C (G379R)          | IM <sup>b</sup> | CACGCCCTGTGCAGGAAGCCAGACC                         | GGTCTGGCTTCCTGCACAGGGCGTG                |
| pCMV-FAM20C (G379E)          | IM              | CACGCCCTGTGCGAGAAGCCAGACC                         | GGTCTGGCTTCTCGCACAGGGCGTG                |
| pCMV-FAM20C (L388R)          | IM              | TCGAGGGCTCGCGGGCGGCCTTCT                          | AGGAAGGCCGCCGCGAGCCCTCGA                 |
| pCMV-FAM20C (R549W)          | IM              | GCCCTGGACCGGTGGCTCCGCGTCGT                        | ACGACGCGGAGCCACCGGTCCAGGGC               |
| pEF-BOS/IP-FAM20B            |                 | CGGGATCCTCAGCTGCCAACCGGGAGGAC                     | CGGGATCCACTTCCAATCCATCTCATAACC           |
| pEF-BOS/IP-FAM20B<br>(D309G) | IM              | GCTCATCCTTCTTGTAATGCCAAAAGCTT                     | AAGCTTTTGGCATTACCAAGAAGGATGAGC           |
| pEF-BOS/IP-FAM20Cs           |                 | CA <u>AAGATCT</u> GAGCCCGGCTGTTCGTG               | CA <u>AAGATCT</u> CCCCTCTGTCTCTGTCCC     |
| pEF-BOS/IP-FAM20C<br>(D478G) | IM              | TTCATCATCCACTTAGGCAATGGAAGAGGG                    | CCCTCTTCCATTGCCTAAGTGGATGATGAA           |
| p3XFLAG-CMV-8-FAM20B         |                 | GCTCTAGATCAGCTGCCAACCGGGAGGAC                     | GCTCTAGAACTTCCAATCCATCTCATAACC           |
| p3XFLAG-CMV-8-FAM20Cs        |                 | GCTCTAGAGAGCCCGGCTGTTCGTG                         | GCTCTAGACCCCTCTGTCTCTGTCCC               |
| pcDNA3Ins-His-C4ST-1         |                 | GCTCTAGACTGCAGGAACTCTACAAC                        | CGGGATCCTAAAAAGCATGATTCTCTC              |
| pEF-BOS/IP-XylT-1            |                 | GA <u>AAGATCT</u> GACAGCAACAACGAGAACTCTG          | GA <u>AAGATCT</u> CTTTCCCGTTGAGATCCTGCTG |
| pEF-BOS/IP-GalT-I            |                 | CGGGATCCTCTGGGGACGTGGCCCGG                        | CGGGATCCTCAGCTGAATGTGCACCA               |
| pEF-BOS/IP-GalT-II           |                 | CCGGATCCGAGCCCGGGGACCCAGG                         | CGGGATCCTCAGGGGATGCCCTCCCTTCT            |

<sup>a</sup>The underlines indicate restriction enzyme sites.

<sup>b</sup>IM, internal mutagenic primers.



**Supplementary Table 9** Primers used for quantitative real-time RT-PCR.

| Human gene                | Forward (5'–3')               | Reverse (5'–3')          |
|---------------------------|-------------------------------|--------------------------|
| <i>GAPDH</i>              | ATGGGTGTGAACCATGAGAAGTA       | GGCAGTGATGGCATGGAC       |
| <i>FAM20B<sup>a</sup></i> | GCCTTAAAATCTGCCATGGC          | GGCATCCTGTCTTCCACCAG     |
| <i>FAM20C<sup>a</sup></i> | GAGAGGCACAATGCGGAGAT          | GGATCTCCTTGGTCATGTTG     |
| <i>CSGALNACT1</i>         | AGAAGAAATAAATGAAGTCAAAGGAATAC | GAAGTAGATGTCCACATCACAG   |
| <i>CSGALNACT2</i>         | CCTAGAATCTGTCACCAGT           | GTTAAGGAATTCGGCTGAGAAATA |
| <i>C4ST1</i>              | AAACGCCAGCGGAAGAA             | GGGATGGCAGAGTGAGTAGA     |
| <i>C4CT2</i>              | GAGGGAAAGTTCTTTGTTTAAGTG      | CGGCCTTAACAGCCATAAT      |
| <i>C6ST1</i>              | TCTGCCATTGGCTTGAAC            | CATGCAGACATGAAATAGCAAAC  |
| Mouse gene                | Forward (5'–3')               | Reverse (5'–3')          |
| <i>Gapdh</i>              | CATCTGAGGGCCCACTG             | GAGGCCATGTAGGCCATGA      |
| <i>C6st1</i>              | CTGGCATTGTGGTCATAGTTT         | AAGAGAGATGCATTCTCCGATAAG |
| <i>Akp2</i>               | CCTGACTGACCCTTCGC             | GTCAAGGTGTCTTTCTGGGA     |

<sup>a</sup>These primer sets are applicable for quantitative real-time RT-PCR of the respective mouse counterparts.
